# Supplementary material for: Using Bayesian-PBPK modeling for assessment of inter-individual variability and subgroup stratification
Source: PubMed Central journal article supplement (PMC4230716; doi:10.1186/2193-9616-1-6), 2013-04-11
Supplement: 40203_2013_6_MOESM1_ESM.pdf [file 40203_2013_6_MOESM1_ESM.pdf]

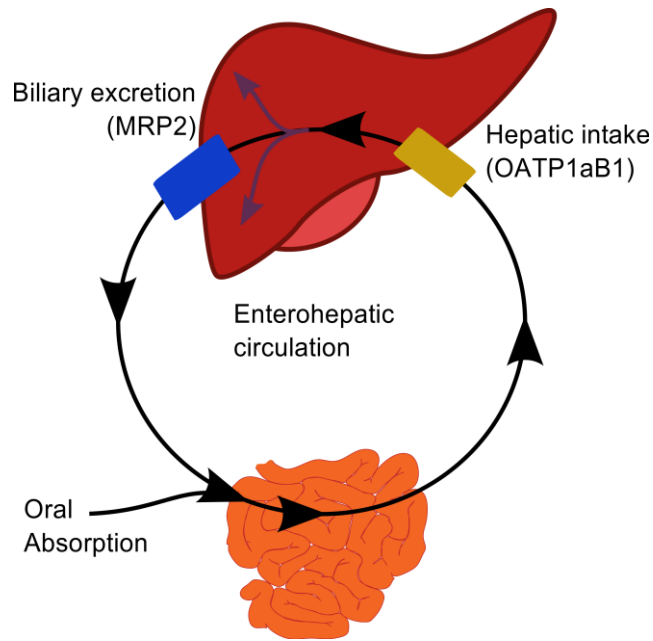

Supplementary Figure S1. Schematic representation of the enterohepatic circulation and the key transporting enzymes in pravastatin pharmacokinetics. It has to be noted, that this is only a simplified consideration for a better representation of the processes. However, the enterohepatic cycle and the transporting enzymes are integrated into the mechanistic whole-body physiologically-based pharmacokinetic model.
